# Supplementary material for: Non-metallic plasmon-assisted upconversion fluorescence for ultrasensitive hydrogen peroxide detection from nM to μM
Source: Royal Society of Chemistry journal article supplement (doi:10.1039/d4nr00344f), 2024-01-01
Supplement: d4nr00344f1.pdf [file d4nr00344f1.pdf]

## Supporting Information

### Nonmetallic plasmon assisted upconversion fluorescence for ultrasensitive hydrogen peroxide detection from nM to $\mu\text{M}$

Juan Li, Xingwu Huang, Jiangyi Chen, Zaizhu Lou,\* and Baojun Li\*

Guangdong Provincial Key Laboratory of Nanophotonic Manipulation, Institute of Nanophotonics, College of Physics & Optoelectronic Engineering, Jinan University, Guangzhou, 511443, China

Corresponding Authors: [zxlou@jnu.edu.cn](mailto:zxlou@jnu.edu.cn); [baojunli@jnu.edu.cn](mailto:baojunli@jnu.edu.cn);

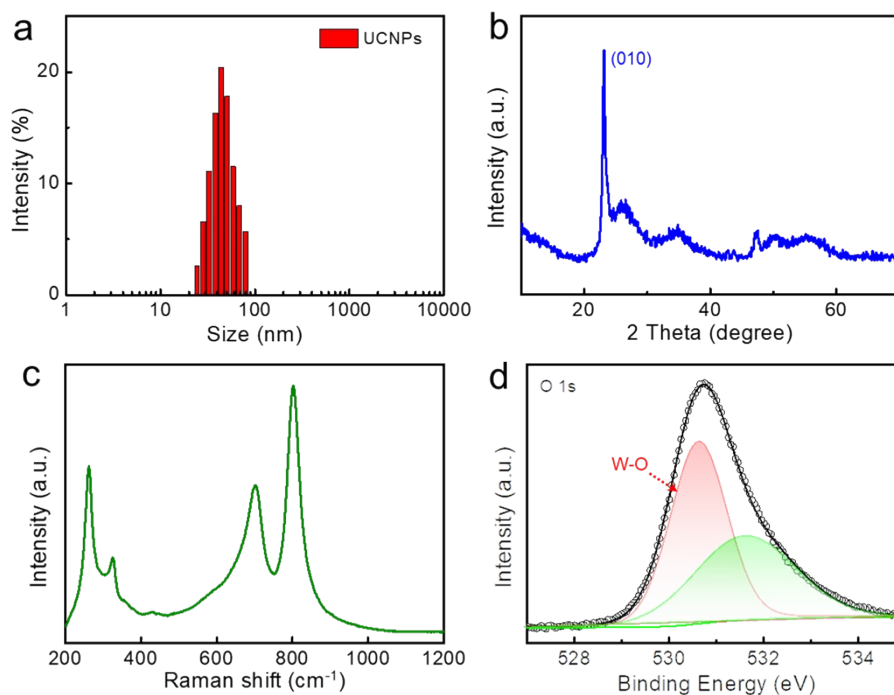

**Figure S1** DLS size distribution (a) of UCNPs. XRD pattern (b), Raman spectrum (c), O 1s XPS spectrum (d) of plasmonic  $\text{WO}_{3-x}$ .

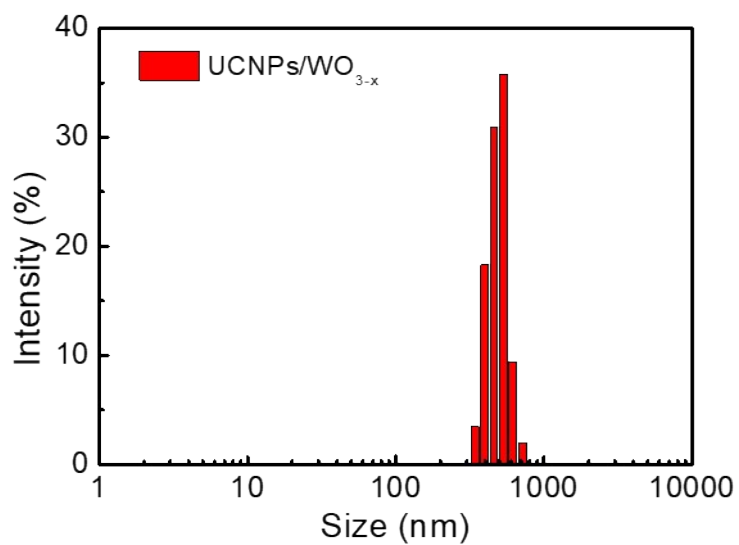

**Figure S2** DLS data of the UCNP/WO<sub>3-x</sub> hybrid.

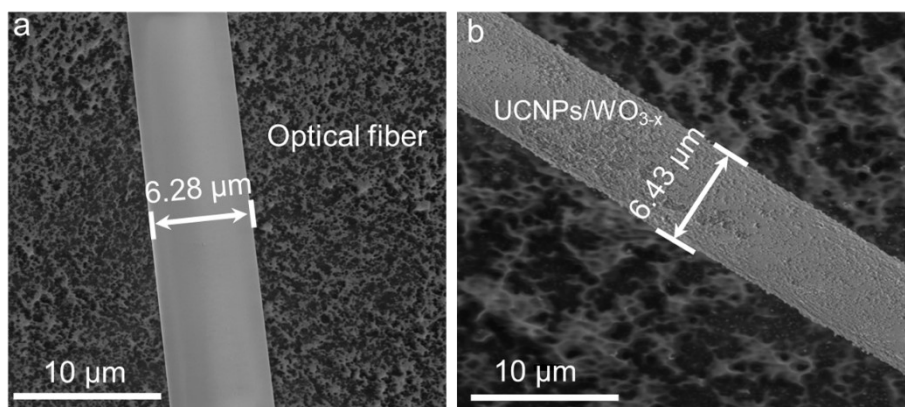

**Figure S3** Typical SEM images of optical fiber (a) and optical fiber coated with UCNP/WO<sub>3-x</sub> (b).

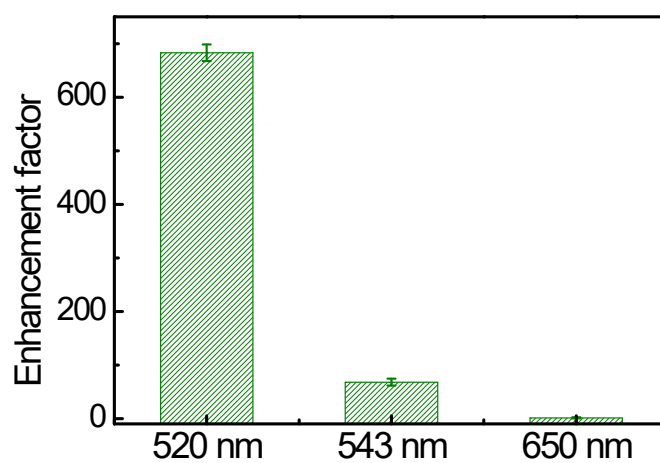

**Figure S4** The enhancement factors diagram of UCNP/WO<sub>3-x</sub> for 520, 543, and 650-nm emission bands.

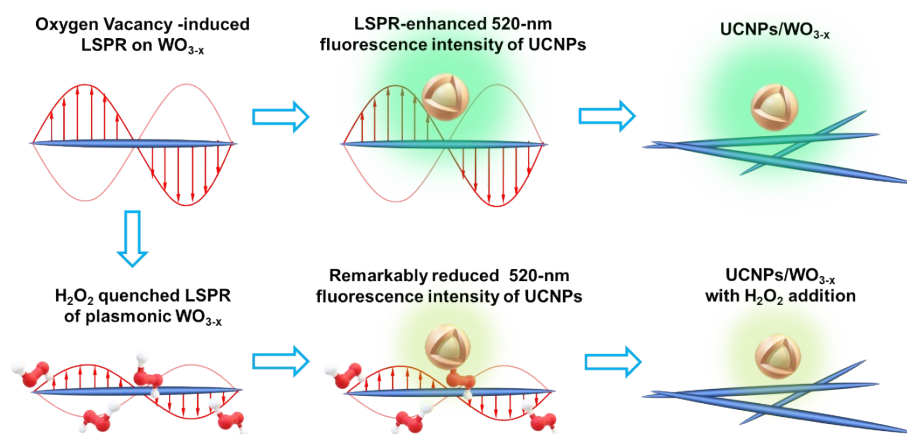

**Figure S5** The illustrated principle diagram of UCNPs/WO<sub>3-x</sub> probe for H<sub>2</sub>O<sub>2</sub> detection.

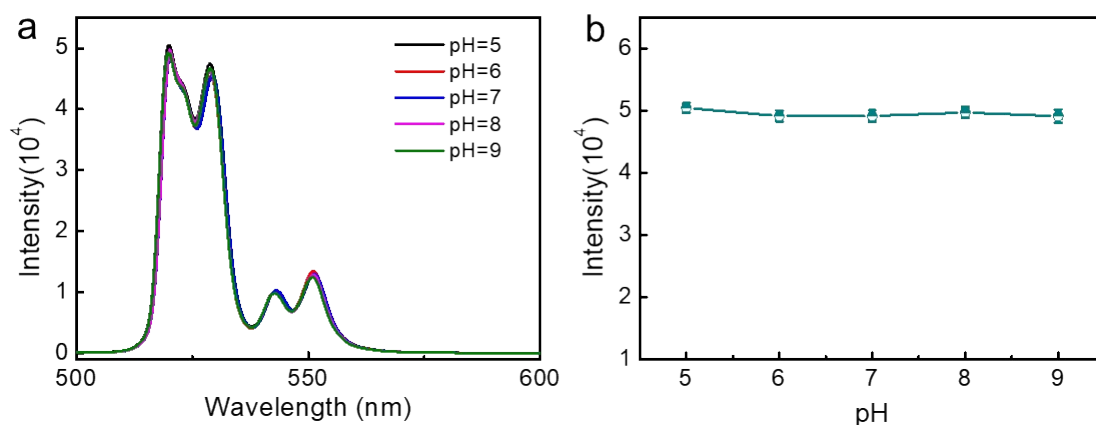

**Figure S6** The fluorescence spectra (a) of UCNPs/WO<sub>3-x</sub> probe under different PH conditions. Dependence of 520-nm fluorescence intensity of UCNPs/WO<sub>3-x</sub> probe on pH (b).

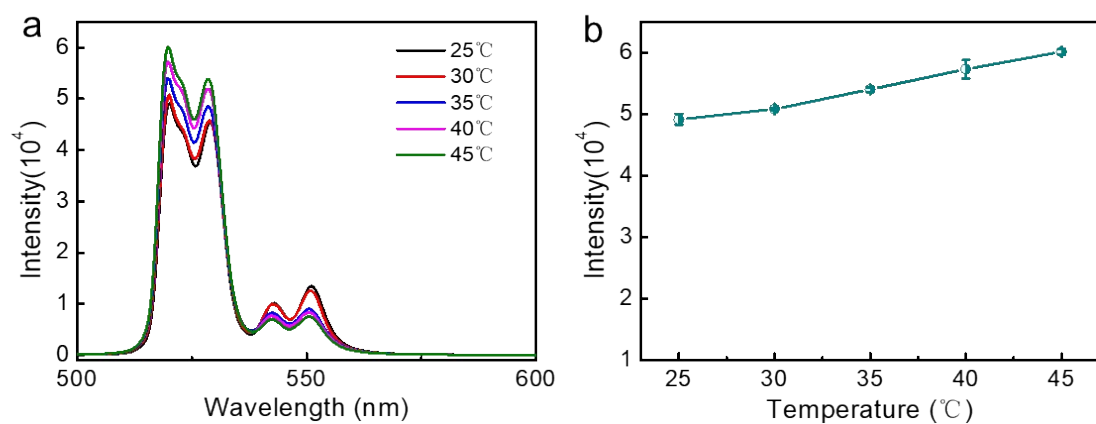

**Figure S7** The fluorescence spectra of UCNPs/WO<sub>3-x</sub> probe under different temperature (a). Dependence of 520-nm fluorescence intensity of UCNPs/WO<sub>3-x</sub> probe on the temperature (b).

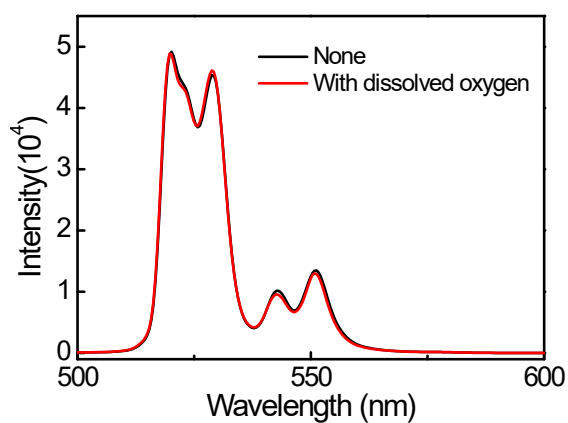

**Figure S8** The fluorescence spectra of UCNPs/ $\text{WO}_{3-x}$  probe in fresh ultrapure water solution with dissolved oxygen.

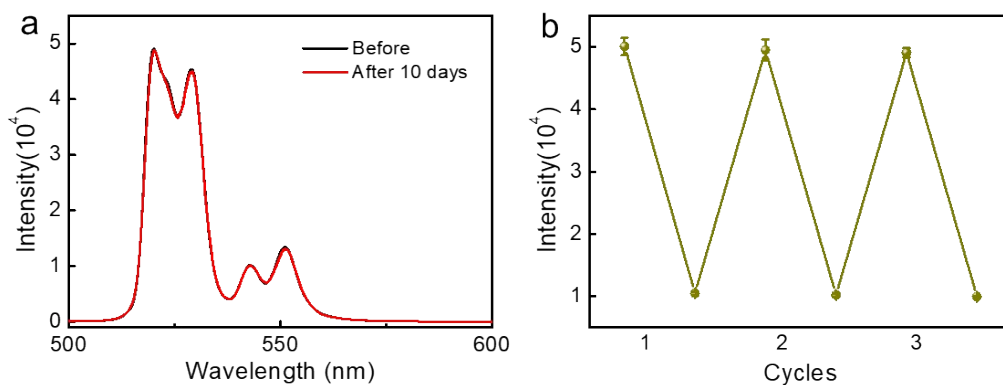

**Figure S9** The fluorescence spectra of UCNPs/ $\text{WO}_{3-x}$  probe before and after 10 days (a). Repeated  $\text{H}_2\text{O}_2$  detection cycles (c) from 0 to  $10 \mu\text{M}$  of UCNPs/ $\text{WO}_{3-x}$  probe.

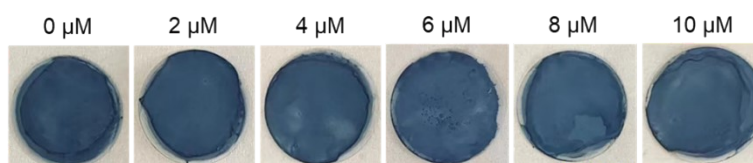

**Figure S10** The photographs of  $\text{WO}_{3-x}$  samples with different  $\text{H}_2\text{O}_2$  concentration addition.

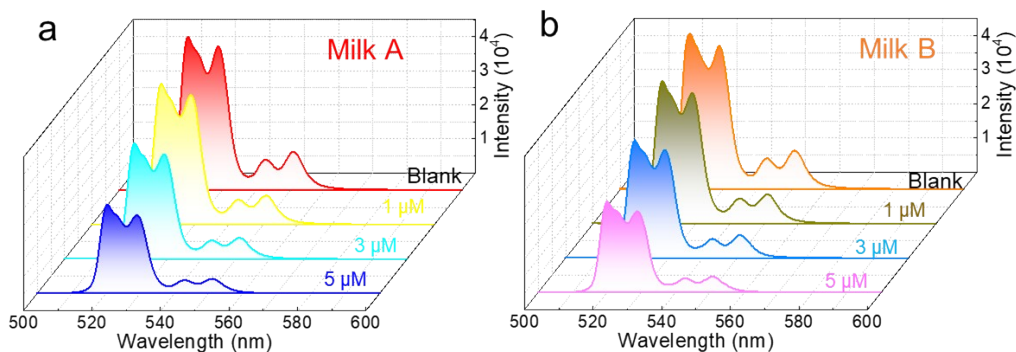

**Figure S11** The fluorescence spectra of UCNPs/ $\text{WO}_{3-x}$  probe with addition of different milk samples.

**Table S1** Comparison of detection performance of various methods

| Method                | Materials                                 | Detection range ( $\mu\text{M}$ ) | Detection limit ( $\mu\text{M}$ ) | Emission      | Response time             | Application                                | Ref.      |
|-----------------------|-------------------------------------------|-----------------------------------|-----------------------------------|---------------|---------------------------|--------------------------------------------|-----------|
| Colorimetric assay    | NiFe-LDHNS                                | 10–500                            | 4.4                               | /             | 10 min                    | Glucose and $\text{H}_2\text{O}_2$         | [1] 2018  |
|                       | $\alpha$ -AgVO <sub>3</sub> rods          | 60–200                            | 2                                 | /             | 2 min                     | Commercial antiseptic sample               | [2] 2017  |
| Electrochemical assay | CoS/RGO nanohybrids                       | 0.1–2542.4                        | 0.042                             | /             | 3 s                       | Biological samples                         | [3] 2018  |
|                       | Pt-NPs/EC                                 | 0.05–2220                         | 0.01                              | /             | /                         | Non-enzymatic determination                | [4] 2017  |
|                       | PB/PEDOT                                  | 0.5–46                            | 0.17                              | /             | /                         | $\text{H}_2\text{O}_2$ Upon NADH Treatment | [5] 2023  |
| Chemiluminescent      | Co(II)-monoethanolamine                   | 1.0–154                           | 0.2                               | /             | 12.5s                     |                                            | [6] 2024  |
| Fluorometric assay    | C-dots                                    | 0.1–40                            | 0.05                              | /             | 10 min                    | Choline and acetylcholine                  | [7] 2014  |
|                       | AlEgen TPE-M-L                            | 0.01–1.0                          | 0.01                              | 460 nm        | 30 min                    | Human serum samples                        | [8] 2018  |
|                       | MIL-101(Fe)                               | 0.1–130                           | 0.0011                            | 430 nm        | 90 min                    | Choline and acetylcholine                  | [9] 2020  |
|                       | Sulfur dope CDs                           | 0–100                             | 0.05                              | 830 nm        | 200 s                     | Cell Mitosis and Mouse Brain               | [10] 2018 |
|                       | Coumarin pyran+galactose                  | 1.0–50                            | 0.33                              | 706 nm        | 15 min                    | Zebrafish                                  | [11] 2020 |
|                       | MoO <sub>3-x</sub> QDs                    | 0–1                               | 0.003                             | 770 nm        | /                         | /                                          | [12] 2021 |
|                       | BTFMB+ESIPT                               | 0–20                              | 0.109                             | 542 nm        | 0–45 min                  | Ferroptosis process                        | [13] 2021 |
|                       | Dicyanoisophorone                         | 0–30                              | 0.35                              | 657 nm        | 15–20 min                 | Milk samples and in vivo                   | [14] 2023 |
|                       | UCNPs                                     | 0.25–5                            | 0.1                               | 800 nm        | /                         | Choline and $\text{H}_2\text{O}_2$         | [15] 2019 |
|                       | UCNPs/B-R-COOH                            | 0–70                              | 0.00434                           | 478 nm        | /                         | Gold pigment                               | [16] 2024 |
| UCNPs-DCM             | 0–10                                      | 0.168                             | 660 nm                            | /             | Hydrogen Peroxide in Vivo | [17] 2019                                  |           |
| <b>This work</b>      | <b>UCNPs/<math>\text{WO}_{3-x}</math></b> | <b>0–50</b>                       | <b>0.001</b>                      | <b>520 nm</b> | <b>/</b>                  | <b>Human serum and milk</b>                |           |

## References

- Zhan, T.; Kang, J.; Li, X.; Pan, L.; Li, G.; Hou, W., NiFe layered double hydroxide nanosheets as an efficiently mimic enzyme for colorimetric determination of glucose and  $\text{H}_2\text{O}_2$ . *Sensors and Actuators B: Chemical* **2018**, *255*, 2635-2642.
- Wang, Y.; Zhang, D.; Wang, J., Metastable  $\alpha$ -AgVO<sub>3</sub> microrods as peroxidase mimetics for colorimetric determination of  $\text{H}_2\text{O}_2$ . *Microchimica Acta* **2017**, *185*.
- Kubendhiran, S.; Thirumalraj, B.; Chen, S. M.; Karuppiyah, C., Electrochemical co-preparation of cobalt sulfide/reduced graphene oxide composite for electrocatalytic activity and determination of  $\text{H}_2\text{O}_2$  in biological samples. *Journal of Colloid and Interface Science* **2018**, *509*, 153-162.
- Karthik, R.; Karikalan, N.; Chen, S. M., Rapid synthesis of ethyl cellulose supported platinum nanoparticles for the non-enzymatic determination of  $\text{H}_2\text{O}_2$ . *Carbohydrate Polymers* **2017**, *164*, 102-108.
- Zhang, S.; Qin, H.; Cheng, S.; Zhang, Y.; Gao, N.; Zhang, M., An electrochemical

nanosensor for monitoring the dynamics of intracellular H<sub>2</sub>O<sub>2</sub> upon NADH treatment. *Angewandte Chemie International Edition* **2023**, *62* .

6. Zhang, R.; Zhong, Y.; Hu, Y.; Chen, Y.; Xia, L.; Li, G., Liquid-phase cyclic chemiluminescence for the Identification of cobalt speciation. *Analytical Chemistry* **2024**, *96* , 3933-3941.
7. Wei, J. F., Ren, J., Liu, J., Meng, X. W., Ren, X. L., Chen, Z. Z., Tang, F. Q., An eco-friendly, simple, and sensitive fluorescence biosensor for the detection of choline and acetylcholine based on C-dots and the Fenton reaction. *Biosensors and Bioelectronics*, **2014**, *52*, 304-309.
8. Chang, J.; Li, H.; Hou, T.; Duan, W.; Li, F., Paper-based fluorescent sensor via aggregation induced emission fluorogen for facile and sensitive visual detection of hydrogen peroxide and glucose. *Biosens Bioelectron* **2018**, *104*, 152-157.
9. Guo, J.; Wu, S.; Wang, Y.; Zhao, M., A label-free fluorescence biosensor based on a bifunctional MIL-101(Fe) nanozyme for sensitive detection of choline and acetylcholine at nanomolar level. *Sensors and Actuators B: Chemical* **2020**, *312*.
10. Guo, H. L.; Chen, G.; Gao, M.; Wang, R.; Liu, Y. X.; Yu, F. B., Imaging-of-endogenous-hydrogen-peroxide-during-the-process-of-cell-mitosis-and-mouse-brain-development. *Analytical Chemistry* **2019**, *91*,1203-1210.
11. Jiang, W. L.; Wang, W. X.; Liu, J.; Li, Y.; Li, C. Y., A novel hepatocyte-targeting ratiometric fluorescent probe for imaging hydrogen peroxide in zebrafish. *Sensors and Actuators B: Chemical* **2020**, *313*.
12. Zhong, S.; Xing, C.; Cao, A.; Zhang, T.; Li, X.; Yu, J.; Cai, W.; Li, Y., Ultra-fast synthesis of water soluble MoO<sub>3-x</sub> quantum dots with controlled oxygen vacancies and their near infrared fluorescence sensing to detect H<sub>2</sub>O<sub>2</sub>. *Nanoscale Horizons* **2020**, *5*, 1538-1543.
13. Zhang, H. C.; Tian, D. H.; Zheng, Y. L.; Dai, F.; Zhou, B., Designing an ESIPT-based fluorescent probe for imaging of hydrogen peroxide during the ferroptosis process. *Spectrochimica Acta Part A: Molecular and Biomolecular Spectroscopy* **2021**, *248*.
14. Peng, T.; Ye, S.; Liu, R.; Qu, J., Colorimetric and fluorescent dual-signals probes for naked-eye detection of hydrogen peroxide and applications in milk samples and in vivo. *Spectrochimica Acta Part A: Molecular and Biomolecular Spectroscopy* **2023**, *297*.
15. Zhang, L.; Yin, S.; Hou, J.; Zhang, W.; Huang, H.; Li, Y.; Yu, C., Detection of choline and hydrogen peroxide in infant formula milk powder with near infrared upconverting luminescent nanoparticles. *Food Chemistry* **2019**, *270*, 415-419.
16. Feng, Y.; Lei, D.; Zu, B.; Li, J.; Li, Y.; Dou, X., A self-accelerating naphthalimide-based probe coupled with upconversion nanoparticles for ultra-accurate tri-mode visualization of hydrogen peroxide. *Advanced Science* **2024**.
17. Wang, H.; Li, Y.; Yang, M.; Wang, P.; Gu, Y., FRET-based upconversion nanoprobe sensitized by Nd<sup>3+</sup> for the ratiometric detection of hydrogen Peroxide in Vivo. *ACS Applied Materials & Interfaces* **2019**, *11*, 7441-7449.
